# Supplementary material for: Hierarchical classification of snowmelt episodes in the Pyrenees using seismic data
Source: PLOS journal article supplement (doi:10.1371/journal.pone.0223644), 2019-10-10
Supplement: S5 (10.1371/journal.pone.0223644.s005) [file journal.pone.0223644.s005]

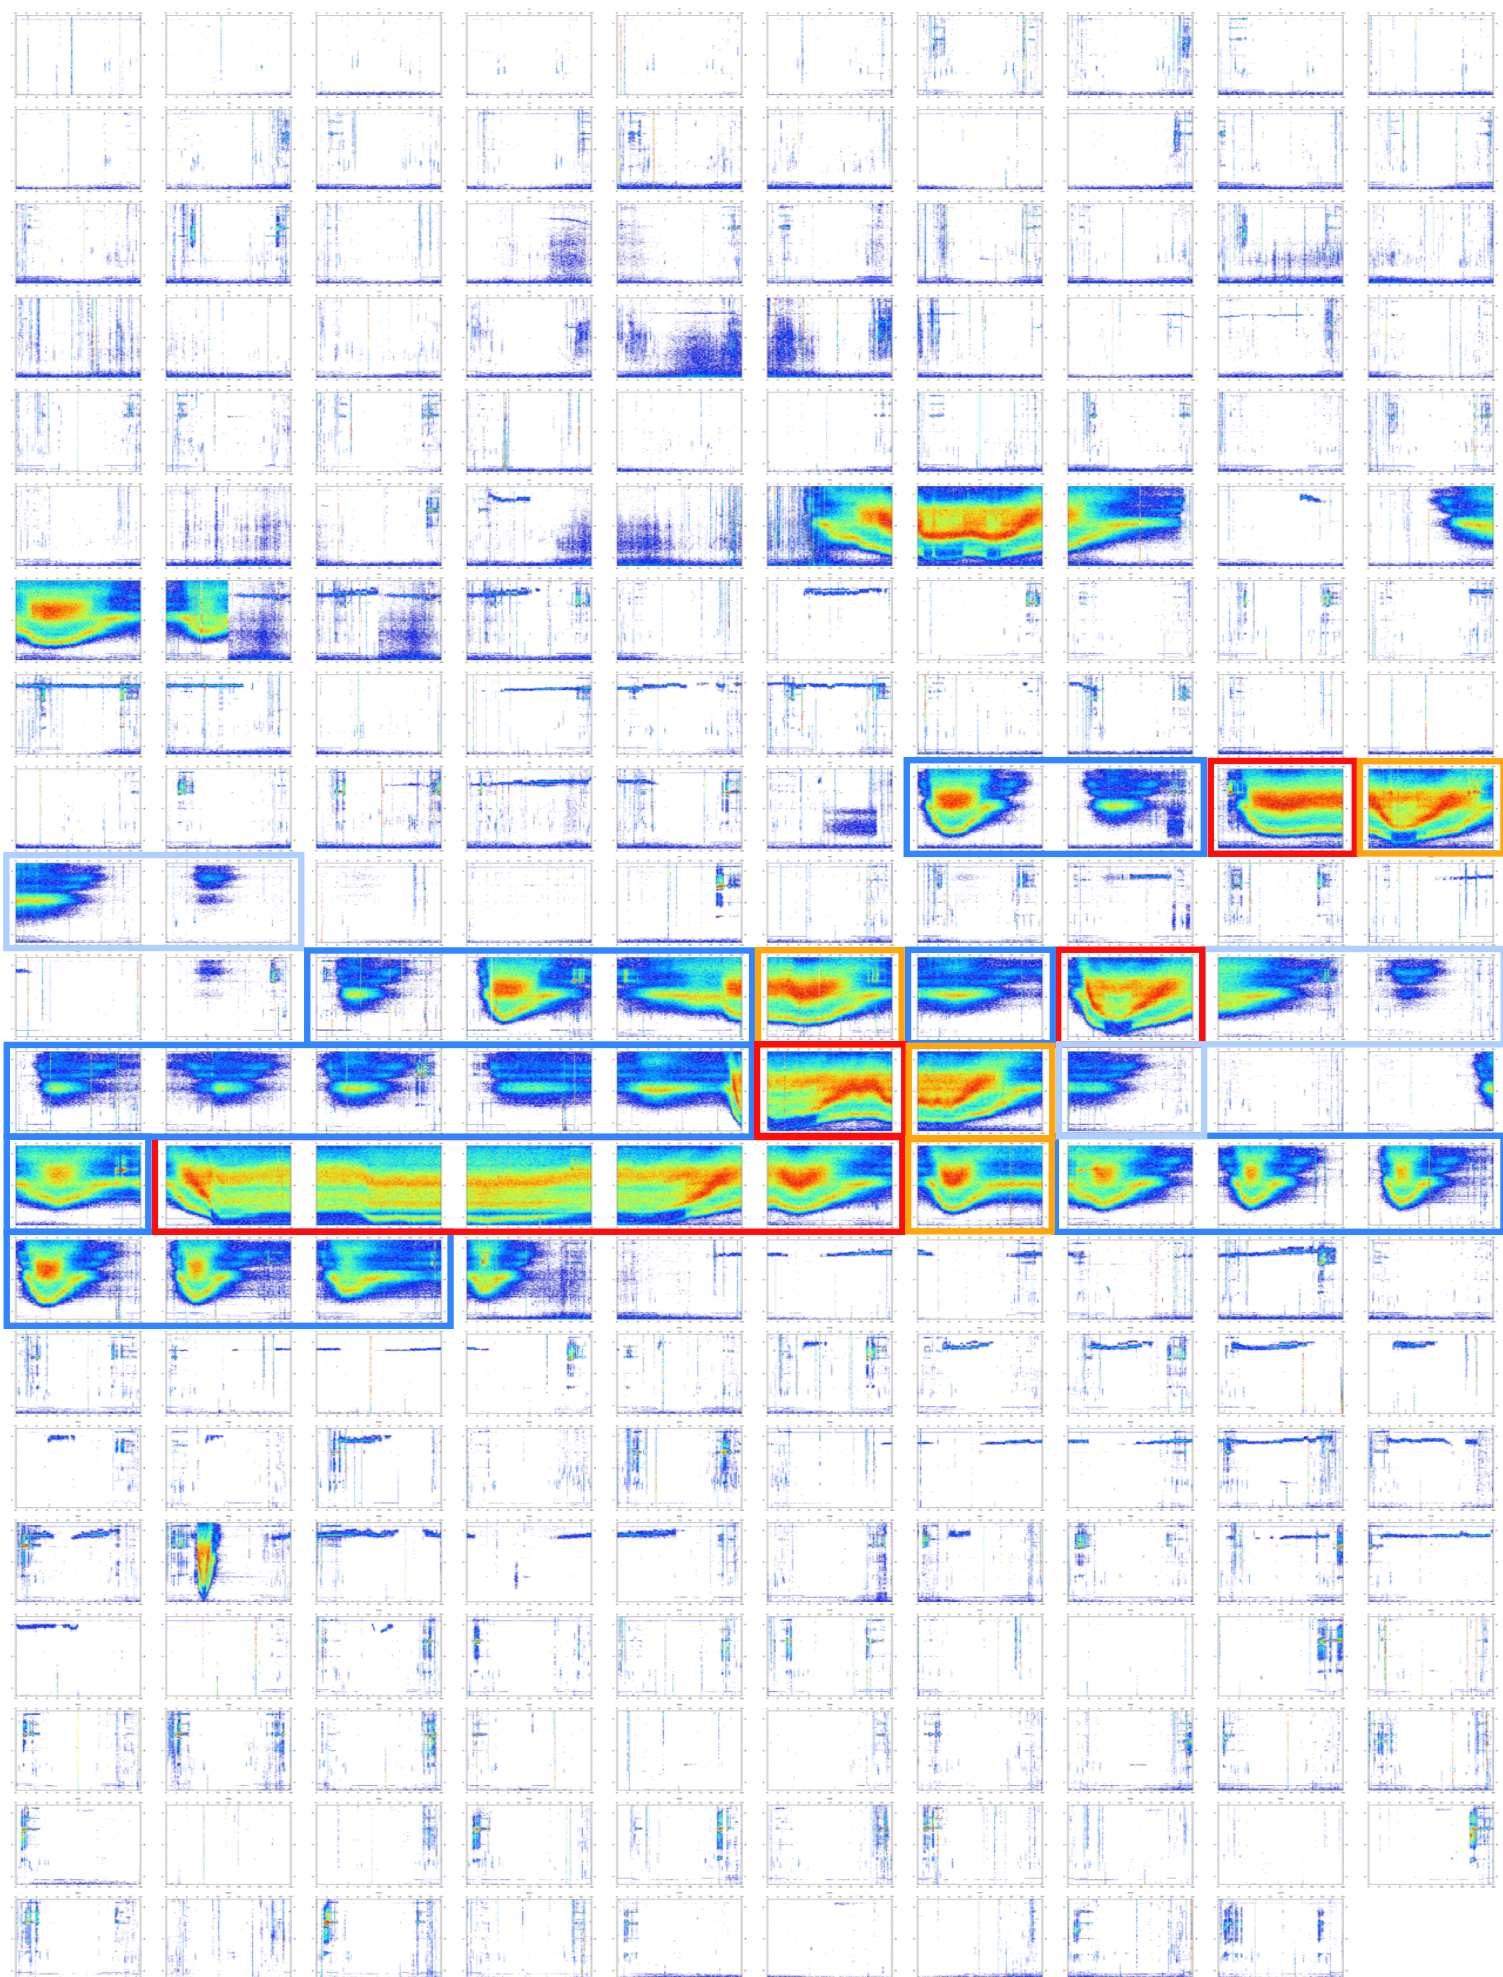

**Supplemental Figure S5:** Daily spectrograms for year 2015 (Julian days 1-200). Each spectrogram begins at 12:00 UTC and end at the same hour the next day. Frequency range: 1.5 - 6.5 Hz. Color boxes show the results from the hierarchical classification (see Fig 8).
